# Supplementary material for: Anin situDRIFTS mechanistic study of CeO2-catalyzed acetylene semihydrogenation reaction
Source: Royal Society of Chemistry journal article supplement (doi:10.1039/c8cp00668g), 2018-01-01
Supplement: c8cp00668g1.pdf [file c8cp00668g1.pdf]

# In-Situ DRIFTS Mechanistic Study of CeO<sub>2</sub>- Catalyzed Acetylene Semihydrogenation Reaction

*Tian Cao, Rui You, Xuanyu Zhang, Shilong Chen, Dan Li, Zhenhua Zhang, and Weixin Huang\**

Hefei National Laboratory for Physical Sciences at the Microscale, CAS Key Laboratory of Materials for Energy Conversion and Department of Chemical Physics, University of Science and Technology of China, Hefei 230026, People's Republic of China.

\*Corresponding author. E-mail: [huangwx@ustc.edu.cn](mailto:huangwx@ustc.edu.cn)

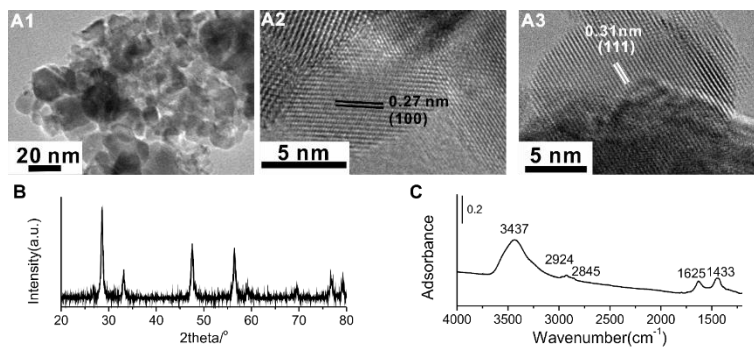

**Figure S1.** (A1-A3) TEM and HRTEM images, (B) XRD pattern, and (C) infrared spectra of as-purchased CeO<sub>2</sub> catalyst.

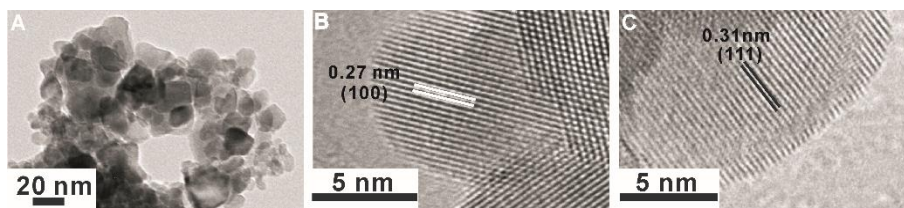

**Figure S2.** TEM and HRTEM images of CeO<sub>2</sub> catalyst after the acetylene hydrogenation catalytic reaction.

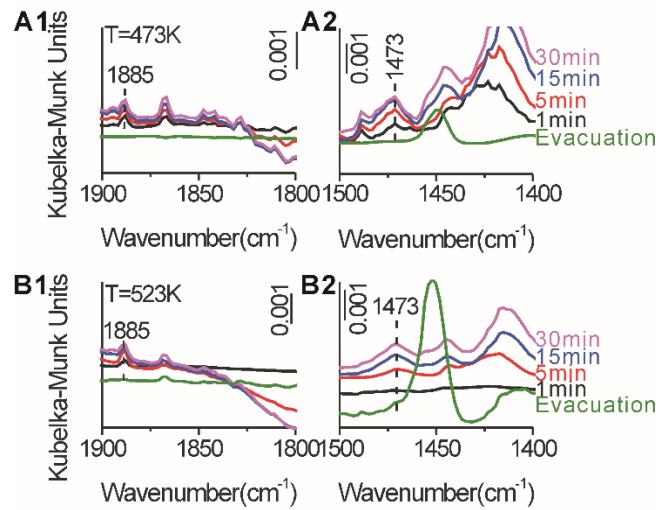

**Figure S3.** In-situ time-resolved DRIFTS spectra of  $C_2H_2$  hydrogenation reaction on  $CeO_2$  catalyst with enlarged parts of gas-phase  $C_2H_4$  signals at (A) 473 and (B) 523 K.
